# Supplementary material for: Characterization of nanometer-thick polycrystalline silicon with phonon-boundary scattering enhanced thermoelectric properties and its application in infrared sensors
Source: Royal Society of Chemistry journal article supplement (doi:10.1039/c4nr04184d), 2014-10-30
Supplement: c4nr04184d1.pdf [file c4nr04184d1.pdf]

### Supplementary Data 1: Mathematical equations used for modeling

(1) Umklapp phonon-phonon scattering events<sup>[1]</sup>:

$$\tau_{Umklapp}^{-1} = 2\gamma^2 \frac{k_B T \omega^4}{\mu V_0 \omega_D} \quad (1)$$

where  $\gamma$  is Gruneisen anharmonicity parameter,  $\mu$  is shear modulus,  $V_0$  is volume per atom,  $\omega_D$  is Debye frequency,  $T$  is ambient temperature and  $\omega$  is phonon angular frequency.

(2) mass-difference impurity scattering<sup>[2]</sup>:

$$\tau_{defect}^{-1} = \frac{nV^2\omega^4(\Delta M)^2}{4\pi v_s^3 M} \quad (2)$$

where  $v_s$  is an averaged phonon group velocity,  $n$  is the dopant concentration is denoted,  $V$  is the volume of the host (silicon) atom,  $M$  is the silicon atomic mass, and  $\Delta M$  is the difference between the host and impurity atomic masses.

(3) Phonon to grain boundary scattering<sup>[3]</sup> :

$$\tau_{grain}^{-1} = \int_0^d \frac{v_s}{d_g(z)} \left( \frac{1-p_{tr}}{1+p_{tr}} \right) dz \quad (3)$$

where  $d_g(z)$  is the grain size at thickness  $z$ ,  $p_{tr}$  is the probability of specular transmission ( $0 \leq p_{tr} \leq 1$ ).

(4) Segregated dopants induced scattering<sup>[4]</sup>:

$$\tau_{segregated\ dopants}^{-1} = \int_0^d \frac{2v_s}{\pi d_g(z)} \left\{ 1 + \left[ e^{\left(\frac{\pi}{2}\right)^2 \delta(\omega,z)} - 1 \right]^{-1} \right\}^{-1} dz \quad (4)$$

where  $\delta(\omega,z)$  is the grain boundary scattering strength.

**Table S1** The parameters used for simulation

| Temperature<br>(K) | Doping concentration<br>(cm <sup>-3</sup> ) | Maximum grain<br>size<br>(nm) | Minimum grain<br>size<br>(nm) |
|--------------------|---------------------------------------------|-------------------------------|-------------------------------|
| 300                | 3*10 <sup>19</sup>                          | 400                           | 100                           |

## Supplementary Data 2: Measurement setup of thermal electric properties of poly-Si

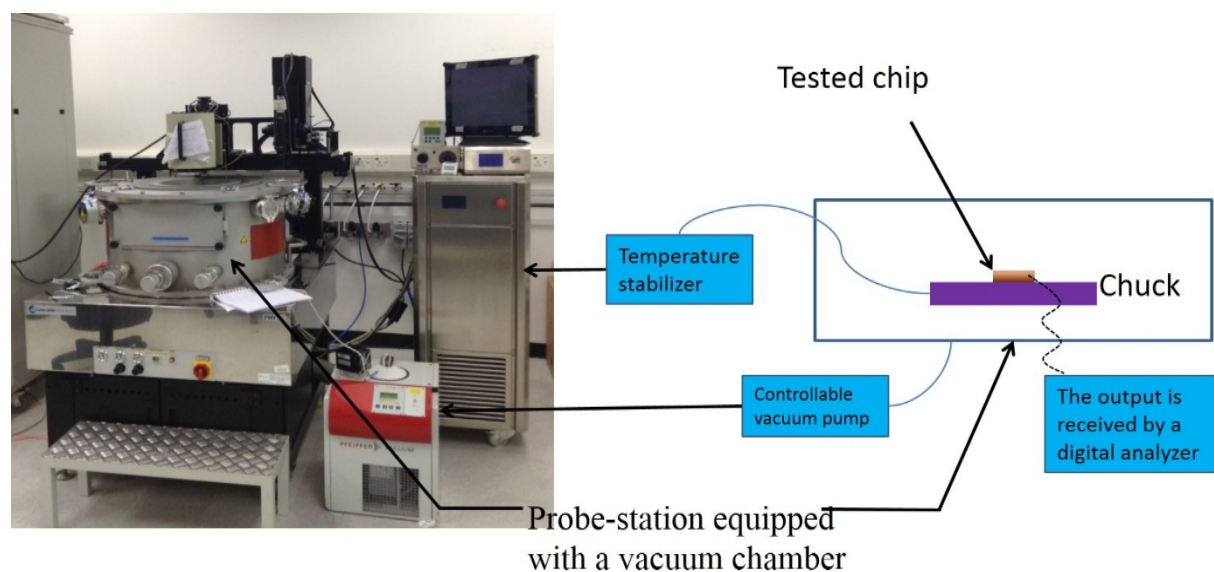

**Figure.S1** Testing setup for the measurement of thermoelectric properties of poly-Si.

The measurement is conducted with a probe-station (Cascade Microtech, PMV200) equipped with a vacuum chamber, which can provide vacuum level at  $10^{-3}$  mbar, to eliminate the influence of the thermal conductance due to air. The Chip is clamped onto a metal chuck, which acts as a large heat sink. The temperature of the chuck is controlled by a temperature stabilizer to maintain a constant temperature. The output signal can be readout by the probe and received by a semiconductor parameter analyzer (Agilent technology, 4156C)

### Supplementary Data 3: Characterization results of the test key

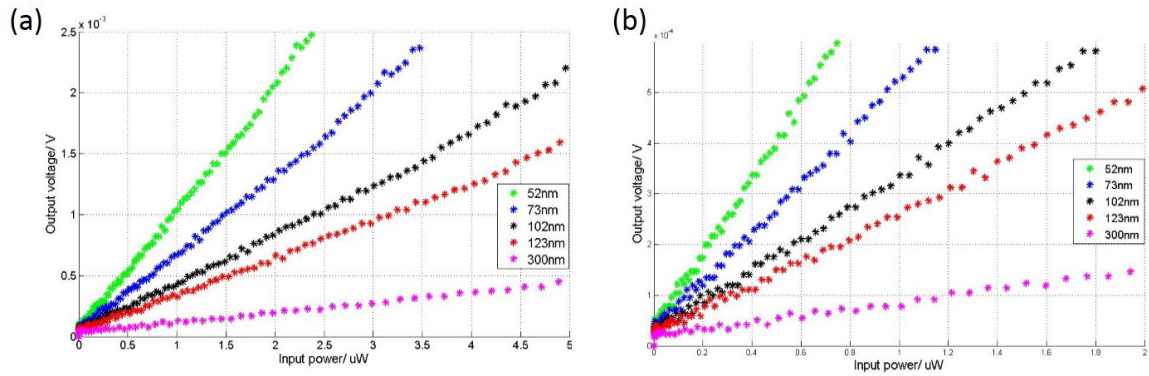

**Figure.S2** The characterization with input power vs. output voltage of n-type poly-Si

(a) and p-type poly-Si (b) test-key at room temperature.

As shown in this figure, the output is quite linear to the input power which suggests the contact between the Al and poly-Si is quite good and the temperature rise caused by the micro-heater do not influence the performance of thermocouple obviously.

- [1] Mingo, N. Calculation of Si nanowire thermal conductivity using complete phonon dispersion relations. *Physical Review B*, 68(11), 113308(2003).
- [2] Zou, J., & Balandin, A. Phonon heat conduction in a semiconductor nanowire. *Journal of Applied Physics*, 89(5), 2932-2938(2001).
- [3] McConnell, A. D., Uma, S., & Goodson, K. E. Thermal conductivity of doped polysilicon layers. *Microelectromechanical Systems, Journal of*, 10(3), 360-369(2001)..
- [4] Goodson, K. E. Thermal conduction in nonhomogeneous CVD diamond layers in electronic microstructures. *Journal of Heat Transfer*, 118(2), 279-286(1996).
